# Supplementary material for: Retinal Neurodegeneration: Correlation between Nutraceutical Treatment and Animal Model
Source: MDPI journal article supplement (doi:10.3390/nu13030770), 2021-02-27
Supplement: s1 [file s1]

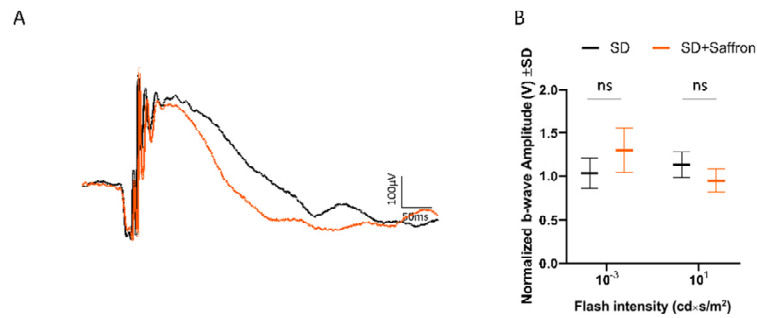

Figure S1: Impact of Saffron treatment on the flash electroretinogram response of SD (Sprague Dawley) rats. A) Representative ERG traces of untreated (black line) and treated (orange line) Sprague Dawley rats. B) b-wave amplitude at two luminance in treated (orange) and untreated (black) rats. No significant differences were found between groups. ( $n=3$ ;  $\pm$ SD; Statistical tests: ONE way ANOVA followed by Dunnett's test; ns=not significant  $10^{-3}$ SDvs $10^{-3}$ SD+Saffron  $p=0.1533$ ;  $10^{-1}$ SDvs $10^{-1}$ SD+Saffron  $p=0.3812$  ).
